# Supplementary material for: Biosynthesis of Antibiotic Leucinostatins in Bio-control Fungus Purpureocillium lilacinum and Their Inhibition on Phytophthora Revealed by Genome Mining
Source: PLoS Pathog. 2016 Jul 14;12(7):e1005685. doi: 10.1371/journal.ppat.1005685 (PMC4946873; doi:10.1371/journal.ppat.1005685)
Supplement: S8 Table — (XLSX) [file ppat.1005685.s022.xlsx]

## Sheet: Table S8A
Table S8A Comparison of protease families.
		PLBJ	PLFJ	P170	HMI	BBA	CMI	MRO	TIN	OSI	TOP	TRE	FOX	AOL	MHA
Aspartic proteases	A01	22	23	25	23	26	27	31	20	13	15	17	21	30	34
	A02	0	0	0	1	0	0	0	0	1	1	0	0	0	0
	A11	2	0	1	2	1	0	0	1	0	0	0	6	0	0
	A22	1	1	1	1	1	1	1	1	1	1	1	1	0	0
	A28	1	1	1	1	1	1	1	1	1	1	0	1	1	1
	A33	0	0	0	1	0	0	1	1	1	1	0	1	1	1
Cysteine proteases	C01	2	2	2	2	1	4	2	1	2	1	1	4	1	0
	C02	3	3	3	3	2	2	1	3	1	3	3	15	2	2
	C04	0	0	0	1	0	0	0	0	0	0	0	0	0	0
	C12	5	6	4	4	4	4	4	5	3	4	4	5	4	2
	C13	1	1	1	1	1	1	1	1	1	1	2	1	1	1
	C14	3	5	5	7	3	3	2	2	2	2	2	5	8	4
	C15	1	1	1	1	1	2	1	1	1	1	1	1	1	1
	C19	14	14	15	17	15	17	15	16	15	14	15	16	18	21
	C26	13	13	11	10	11	10	10	12	7	11	10	12	10	10
	C40	2	2	4	0	1	1	1	0	0	1	0	0	0	0
	C44	4	4	4	7	5	5	5	6	3	4	4	4	5	5
	C45	1	1	1	0	1	2	0	0	0	0	0	1	1	1
	C48	3	2	3	3	3	2	3	4	4	3	3	3	3	3
	C50	1	1	1	1	1	1	1	1	0	1	1	1	1	1
	C54	1	1	1	2	1	0	1	1	1	1	1	1	1	1
	C56	7	7	8	5	6	6	7	5	3	3	5	9	2	5
	C65	1	1	1	2	1	1	1	1	1	1	0	0	1	1
	C69	0	0	1	0	0	1	1	0	0	0	0	1	0	0
	C82	0	0	0	0	0	0	0	0	0	0	0	1	0	0
	C85	2	2	2	2	2	2	2	2	1	2	1	2	3	3
	C89	0	0	0	0	0	0	0	0	0	0	0	0	1	1
	C97	2	2	2	2	2	2	2	2	2	2	2	2	2	2
Glutamic proteases	G01	5	6	6	0	7	8	4	4	0	2	4	3	1	0
	I01	0	0	0	0	1	1	2	0	0	0	0	0	0	0
	I02	0	0	0	0	0	0	0	0	0	0	0	0	0	0
	I04	0	0	3	0	0	0	1	0	0	0	0	0	0	0
	I07	0	0	1	0	0	0	1	0	0	0	0	0	0	0
	I08	0	0	0	0	0	0	2	0	0	0	0	0	0	1
	I09	1	2	1	4	3	4	4	3	1	5	2	4	2	2
	I13	0	0	0	0	1	0	0	0	1	0	1	0	1	1
	I15	0	0	1	0	1	0	0	0	0	0	1	1	1	1
	I17	0	1	0	0	0	0	0	0	0	0	0	0	0	1
	I18	0	0	1	0	0	0	0	0	0	0	0	0	0	0
	I20	1	1	0	0	0	0	0	0	0	0	0	0	0	0
	I25	0	0	0	0	0	1	0	0	0	0	0	0	0	0
	I27	0	0	0	0	0	0	0	0	0	0	0	0	0	1
	I32	1	1	1	1	1	1	1	1	1	1	1	1	1	1
	I33	0	0	0	0	0	0	0	0	0	0	0	0	1	0
	I46	0	0	0	0	0	0	0	1	0	0	0	0	0	0
	I51	2	2	1	1	2	0	0	3	0	1	1	2	2	2
	I66	0	0	0	0	0	0	0	0	0	0	0	0	9	8
	I68	0	0	0	0	0	0	0	0	0	0	0	0	0	0
	I78	1	1	0	1	0	0	0	1	0	0	1	0	1	0
	I87	2	2	2	2	2	2	2	2	2	2	2	2	2	2
Metallo proteases	M01	4	4	6	4	5	5	4	4	3	4	4	4	3	4
	M03	5	5	8	4	7	8	5	5	1	3	2	4	2	3
	M04	1	1	1	1	1	1	1	3	1	1	2	1	2	1
	M06	1	0	0	0	0	0	0	0	0	0	0	0	0	1
	M10	2	2	1	1	1	0	3	2	0	1	1	2	6	13
	M12	1	3	2	1	2	2	2	2	1	1	2	3	1	3
	M13	0	0	0	1	0	0	0	0	1	0	0	2	0	2
	M14	3	3	4	4	3	4	4	2	1	3	4	7	3	4
	M16	5	5	6	6	6	6	7	5	6	6	6	21	6	6
	M18	2	2	2	2	3	2	2	2	2	2	2	2	2	2
	M19	2	2	2	0	1	1	0	1	0	1	2	3	1	1
	M20	16	16	14	5	11	13	9	5	3	7	8	14	5	6
	M24	12	12	13	10	9	11	11	12	9	10	10	12	10	10
	M28	9	11	9	10	8	9	9	8	8	11	9	15	15	13
	M35	7	6	5	4	3	2	5	1	4	3	1	2	0	0
	M36	2	2	2	0	0	1	2	1	3	0	1	1	0	0
	M38	13	12	16	6	11	11	11	9	4	9	11	15	9	8
	M41	2	2	2	2	2	2	2	2	2	2	2	2	2	2
	M43	3	3	18	18	13	8	18	7	10	1	1	2	4	7
	M48	2	2	2	2	3	3	2	2	1	2	2	2	2	2
	M49	2	2	2	2	3	5	2	1	1	1	1	1	2	2
	M54	0	0	2	0	0	0	0	1	0	1	0	0	1	1
	M61	0	0	0	0	1	0	0	0	0	0	0	0	0	0
	M67	7	7	7	7	7	7	7	7	6	7	7	7	7	7
	M76	1	1	1	1	1	1	1	1	0	1	1	1	1	1
	M77	1	1	0	6	0	1	5	1	2	0	0	2	1	1
	M79	1	1	1	0	1	1	0	1	1	1	1	1	1	1
	M80	3	3	3	3	3	1	3	3	1	4	3	2	3	3
	M81	1	1	1	1	1	1	1	2	1	0	1	0	0	0
Mixed proteases	P01	2	2	4	1	3	3	2	1	1	0	3	2	0	0
Serine proteases	S01	5	6	9	5	20	12	35	2	1	2	2	10	4	3
	S08	34	36	32	20	26	18	46	16	12	15	17	28	44	55
	S09	54	53	81	52	51	43	52	40	16	39	43	127	47	53
	S10	10	11	13	16	12	11	11	10	8	11	5	13	4	13
	S12	21	21	29	11	22	19	17	15	7	11	8	17	3	5
	S14	1	1	1	1	1	1	1	1	1	1	1	1	1	1
	S15	0	0	1	0	0	0	0	0	0	1	0	0	0	0
	S16	2	2	2	2	2	2	3	2	1	2	2	2	2	2
	S26	3	3	3	3	3	3	2	2	3	3	2	2	3	3
	S28	2	2	4	1	4	4	6	3	0	3	3	2	3	5
	S33	50	51	63	44	37	33	42	30	18	30	39	88	33	34
	S51	0	0	1	0	0	0	0	0	0	0	1	0	0	0
	S53	9	9	6	1	15	15	9	6	1	3	5	4	3	7
	S54	2	2	2	3	3	3	2	3	2	2	3	3	2	3
	S59	1	1	1	1	1	1	1	1	1	1	1	10	1	1
	S64	0	0	0	1	0	0	0	0	0	0	0	0	0	0
	S66	0	0	3	1	0	0	0	1	0	0	0	1	0	0
Threonine proteases	T01	14	14	13	14	14	14	14	14	12	15	14	14	14	14
	T02	2	3	3	2	2	2	4	1	1	2	3	3	2	2
	T03	4	7	4	3	3	5	5	3	2	3	4	3	3	3
	T05	1	1	1	1	1	1	1	1	0	1	1	1	1	1
TOTAL		430	443	521	382	430	401	468	334	225	301	319	575	371	419
PLBJ, Purpureocillium lilacinum strain PLBJ-1; PLFJ, Purpureocillium lilacinum strain PLFJ-1; P170, Pochonia chlamydosporia strain 170; HMI, Hirsutella minnesotensis; BBA, Beauveria bassiana; CMI, Cordyceps militaris; MRO, Metarhizium robertsii; TIN, Tolypocladium inflatum; OSI, Ophiocordyceps sinensis; TOP, Tolypocladium ophioglossoides; TRE, Trichoderma reesei; FOX, Fusarium oxysporum (fol); AO…

## Sheet: Table S8B
Table S8B Description of putative proteases PLBJ-1.
GeneID	Family	Predicted active site residues	HitID	e-value
VFPBJ_00029	A01A	D88, Y132, D280	MER080922	1.1e-57
VFPBJ_00402	A01A	D100, Y150, D303	MER080922	1.5e-144
VFPBJ_00733	A01A	S61D/H, K109F/S/Y, >D	MER000936	1.3e-07
VFPBJ_01182	A01A	D86, Y134, D279	MER002153	8.7e-58
VFPBJ_01649	A01A	D82, I128F/S/Y, D274	MER080922	1.5e-61
VFPBJ_01713	A01A	D107, Y151, X291D	MER000928	6.4e-107
VFPBJ_02586	A01A	D122, Y166, D305	MER000928	6.9e-98
VFPBJ_02770	A01A	D123, F231, D337	MER090759	3.1e-62
VFPBJ_03705	A01A	D129, Y173, D315	MER000928	1.4e-85
VFPBJ_03786	A01A	D84, Y137, D281	MER000935	2.2e-33
VFPBJ_04585	A01A	D164, Y207, D344	MER078983	1.4e-66
VFPBJ_05209	A01A	G50D/H, Y103, P242D	MER000938	1.8e-11
VFPBJ_05238	A01A	S80D/H, M130F/S/Y, >D	MER080922	1.7e-15
VFPBJ_05870	A01A	D102, Y149, D289	MER000928	1.1e-53
VFPBJ_07080	A01A	D155, Y203, D370	MER080922	4.6e-46
VFPBJ_07702	A01A	D86, Y130, D278	MER080922	6.8e-60
VFPBJ_08333	A01A	D73, Y122, D273	MER003669	8.6e-39
VFPBJ_09042	A01A	D120, Y164, X299D	MER000928	4.2e-87
VFPBJ_09219	A01A	D177, Y221, D363	MER006243	1.9e-70
VFPBJ_09311	A01A	<D/H, <F/S/Y, <D	MER005644	8.8e-06
VFPBJ_10369	A01A	D103, Y146, D284	MER000941	2.5e-127
VFPBJ_10633	A01A	D59, Y103, D244	MER003037	1.4e-83
VFPBJ_11260	A11A	D356	MER004751	6.5e-05
VFPBJ_11706	A11A	D447	MER004751	6e-05
VFPBJ_00190	A22B	D312, D350	MER014430	2e-20
VFPBJ_00911	A28	D593	MER030081	1.8e-46
VFPBJ_02300	C01A	<Q, <C, <H, >N/Q	MER002752	4.5e-05
VFPBJ_00225	C01B	Q119, C125, H430, N453	MER002481	3.5e-97
VFPBJ_03693	C02A	<Q, <C, H374, N395	MER019360	1.7e-26
VFPBJ_06020	C02A	Q183, C189, H356, N377	MER005406	3.8e-66
VFPBJ_09597	C02A	<Q, <C, H368, N388	MER019360	4.7e-23
VFPBJ_00136	C12	Q101, C107, H181, D197	MER000836	2e-42
VFPBJ_00528	C12	Q508, C514, H589, D604	MER013494	3.2e-70
VFPBJ_04554	C12	Q104, C110, H184, E200D	MER000836	1.2e-23
VFPBJ_07281	C12	Q326, C332, >H, >D	MER015601	1.1e-21
VFPBJ_11292	C12	<Q, <C, H59, D76	MER002474	8.6e-14
VFPBJ_00804	C13	H147, C189	MER002477	3.6e-118
VFPBJ_01427	C14B	H315, C375	MER039457	3.9e-05
VFPBJ_07278	C14B	H227, C283	MER114503	4.5e-78
VFPBJ_11039	C14B	H260, C316	MER114503	5.7e-72
VFPBJ_03107	C15	E110, C183, H207	MER011032	9.3e-14
VFPBJ_01172	C19	N1633, C1638, >H, >D/N	MER185433	3e-57
VFPBJ_02344	C19	N364, C369, H690, D707	MER005436	2.8e-84
VFPBJ_03013	C19	<N, <C, H450, D473	MER005855	7.9e-15
VFPBJ_03258	C19	N1615, C1620, >H, >D/N	MER001879	1.4e-72
VFPBJ_04165	C19	<N, <C, H438, D454	MER004311	2.4e-81
VFPBJ_06603	C19	N113, C118, >H, >D/N	MER000757	3.4e-57
VFPBJ_06887	C19	I492N, S497C, >H, >D/N	MER030317	3.2e-32
VFPBJ_07211	C19	A185N, Y190C, H472, N487	MER012131	4.3e-53
VFPBJ_07350	C19	N605, C610, >H, >D/N	MER000865	7.4e-13
VFPBJ_07759	C19	<N, <C, >H, >D/N	MER000864	5.9e-27
VFPBJ_07849	C19	N215, D220C, V358H, V358D/N	MER064621	1.1e-66
VFPBJ_08059	C19	N252, C257, H500, D517	MER002179	4.4e-129
VFPBJ_09125	C19	N598, C603, H902, N922	MER001884	1.7e-31
VFPBJ_09575	C19	<N, <C, H734, N754	MER001881	1.2e-67
VFPBJ_00741	C26		MER060647	9.3e-102
VFPBJ_00815	C26	D360C, P446H, >E	MER046161	1.2e-98
VFPBJ_01159	C26	C402, H531, E533	MER437468	5.8e-93
VFPBJ_01266	C26	C104, H198, E200	MER045094	2.4e-81
VFPBJ_01481	C26	C164, H250, E252	MER043475	1.5e-23
VFPBJ_01661	C26	C104, >H, >E	MER066916	1.2e-27
VFPBJ_02442	C26	C97, H192, E194	MER044622	2.6e-33
VFPBJ_02473	C26	C122, H224, A226E	MER043475	5.7e-12
VFPBJ_07634	C26	C119, >H, >E	MER045095	4.2e-18
VFPBJ_08283	C26	C112, H198, E200	MER043475	4.5e-23
VFPBJ_09009	C26	C101, H184, E186	MER043475	1.2e-09
VFPBJ_09886	C26	C81, H188, E190	MER065588	8.2e-30
VFPBJ_10519	C26	C93, H186, E188	MER045886	4.2e-87
VFPBJ_02608	C40	C68, H125, N137	MER003807	3.7e-16
VFPBJ_09605	C40	C247, H304, E316H/N	MER014188	1e-14
VFPBJ_04210	C44	C2	MER012158	2.1e-67
VFPBJ_05449	C44	C54	MER198917	1.8e-71
VFPBJ_05631	C44	C2	MER011806	1.6e-27
VFPBJ_09258	C44	C2	MER034539	1e-49
VFPBJ_05181	C45	C101	MER004220	2.7e-46
VFPBJ_01610	C48	H115, D132, Q168, C174	MER064210	9.7e-72
VFPBJ_02722	C48	H1075, D1092, Q1133, C1139	MER005202	1.1e-17
VFPBJ_07861	C48	H733, D800, Q844, C850	MER011024	1.1e-40
VFPBJ_01219	C50	H1931, C1958	MER010982	6.3e-73
VFPBJ_07228	C54	Y141, C184, D357, H359	MER013559	2e-61
VFPBJ_01521	C56	C139E, H140C	MER031431	1.7e-35
VFPBJ_02544	C56	L186E, C187	MER038141	1.5e-38
VFPBJ_04697	C56	A1113E, F1147C, S1148H	MER042827	5.8e-24
VFPBJ_06270	C56	C135E, H136C	MER031431	9.3e-15
VFPBJ_09528	C56	R88E, C114, T115H	MER002455	4.2e-09
VFPBJ_09548	C56	V128E, C156, T157H	MER014721	3.4e-06
VFPBJ_11273	C56	L188E, C189	MER038141	2.2e-37
VFPBJ_10976	C65	D354, C357, H550	MER029056	6.2e-35
VFPBJ_09930	C85A	D196, C199, H324	MER400048	6.3e-16
VFPBJ_07217	C85B	D122, C125, H226	MER116559	4.6e-24
VFPBJ_03951	C97	H52, C128	MER308294	1.6e-27
VFPBJ_07671	C97	H32, C100	MER323972	5.7e-32
VFPBJ_01947	G01	Q95, E180	MER002615	1.4e-13
VFPBJ_02177	G01	Q113, E195	MER003426	3.3e-55
VFPBJ_03362	G01	Q113, E196	MER003426	1e-41
VFPBJ_03570	G01	Q102, E184	MER003426	4.1e-64
VFPBJ_06159	G01	Q67, E150	MER001320	3.3e-36
VFPBJ_00630	I09		MER018320	3e-07
VFPBJ_02434	I20		MER018777	6.7e-05
VFPBJ_01876	I32		MER018608	3.1e-14
VFPBJ_01813	I51		MER029866	1.3e-16
VFPBJ_06667	I51		MER018285	1.1e-11
VFPBJ_10905	I78		MER059865	3.9e-05
VFPBJ_04856	I87		MER192051	3.3e-11
VFPBJ_05862	I87		MER192051	1.9e-09
VFPBJ_05371	M01	E323, Y408	MER001010	9.2e-75
VFPBJ_08294	M01	E330, Y415	MER001010	4.5e-95
VFPBJ_08840	M01	T451E, >Y	MER026493	3.4e-14
VFPBJ_10079	M01	E356, Y443	MER002281	4e-79
VFPBJ_01873	M03A	E485	MER003110	2.2e-194
VFPBJ_02077	M03A	E451	MER001149	5.2e-79
VFPBJ_03197	M03A	>E	MER001156	3.8e-66
VFPBJ_05302	M03A	E447	MER003110	2.2e-124
VFPBJ_09749	M03A	E480	MER003110	6.7e-147
VFPBJ_04854	M04	I235E, M336H	MER115298	2.4e-81
VFPBJ_07041	M06	E296	MER016428	9.2e-05
VFPBJ_02022	M10A	E159	MER156574	2.5e-25
VFPBJ_09433	M10A	E259	MER012071	7.3e-20
VFPBJ_05649	M12B	E426	MER182135	1.7e-29
VFPBJ_00559	M14A	R313, K477E	MER003908	9.3e-49
VFPBJ_06247	M14A	R238, E386	MER003908	7.5e-127
VFPBJ_09699	M14A	R201, >E	MER011257	2.2e-22
VFPBJ_02584	M16B	D98E, Q168E	MER001229	2e-30
VFPBJ_05553	M16B	-76E, V143E	MER003544	4.8e-13
VFPBJ_08519	M16B	E86, E156	MER001229	9.8e-74
VFPBJ_06064	M16C	E67, E139	MER003909	2.8e-93
VFPBJ_06067	M16C	E87, E160	MER015270	1.7e-130
VFPBJ_03623	M18	D87, E305	MER003372	3.6e-82
VFPBJ_07732	M18	D206, E425	MER003372	1.5e-78
VFPBJ_08116	M19		MER011422	1.5e-59
VFPBJ_10784	M19		MER011343	8.4e-71
VFPBJ_00463	M20A	D466, E526	MER003798	3e-27
VFPBJ_01636	M20A	D144, E210	MER001269	2.3e-94
VFPBJ_01821	M20A	D160, E229	MER003798	7e-10
VFPBJ_06208	M20A	D174, E239	MER001269	2.7e-101
VFPBJ_06427	M20A	D93, E160	MER003798	3.3e-16
VFPBJ_09628	M20A	D175, E242	MER001269	7.6e-93
VFPBJ_01757	M20D	E189	MER014418	1.7e-39
VFPBJ_02194	M20D	D87E	MER002007	5.6e-53
VFPBJ_07430	M20D	D98E	MER002655	3.6e-48
VFPBJ_09008	M20D	E148	MER014418	1.4e-34
VFPBJ_09516	M20D	E155	MER014418	2e-11
VFPBJ_09783	M20D	E157	MER014418	6.9e-45
VFPBJ_10935	M20D	E52	MER014418	5.8e-40
VFPBJ_11096	M20D	E148	MER014418	5.5e-51
VFPBJ_05003	M20F	D504, X569E	MER026494	6.7e-44
VFPBJ_09350	M20F	D100, E166	MER026471	6.3e-158
VFPBJ_02391	M24A	H193	MER001728	2.8e-122
VFPBJ_08338	M24A	H206	MER001342	1e-98
VFPBJ_08994	M24A	H223	MER001728	1.4e-104
VFPBJ_00042	M24B	H244, H351, H362	MER001733	1.6e-69
VFPBJ_02496	M24B	F83H, P172H, H183	MER002038	4.1e-09
VFPBJ_02646	M24B	H261, H368, H379	MER001733	3.1e-27
VFPBJ_04837	M24B	H320, H422, H433	MER013463	3e-60
VFPBJ_06008	M24B	H395, H485, H498	MER003105	1.1e-87
VFPBJ_06913	M24B	H311, H411, H422	MER005715	1.6e-48
VFPBJ_09630	M24B	R236H, N322H, S333H	MER004931	1.3e-21
VFPBJ_03303	M24X	<H	MER005497	2.1e-25
VFPBJ_09318	M24X	G270H	MER026495	4.5e-50
VFPBJ_01014	M28A	D237, E288	MER032443	1.3e-39
VFPBJ_01968	M28A	D191, E246	MER032443	1e-96
VFPBJ_08830	M28A	D131, E190	MER015094	7.6e-57
VFPBJ_09652	M28A	V315D, D356E	MER001288	1.2e-48
VFPBJ_09808	M28A	D190, E239	MER032443	1.6e-52
VFPBJ_08448	M28B	I402D, L444E	MER015691	1.4e-53
VFPBJ_10921	M28B	I532D, L573E	MER015691	2.9e-49
VFPBJ_03471	M28X	D360, E404	MER001911	1e-37
VFPBJ_10308	M28X	D197, E241	MER001911	1.9e-40
VFPBJ_00032	M35	E301	MER001399	8.9e-43
VFPBJ_03637	M35	E229	MER014227	6.7e-15
VFPBJ_04803	M35	E242	MER001394	1.2e-10
VFPBJ_05087	M35	E306	MER001399	2.4e-49
VFPBJ_06219	M35	E316	MER001394	7.9e-17
VFPBJ_06455	M35	E303	MER001394	3.2e-32
VFPBJ_10720	M35	E380	MER001399	5.1e-11
VFPBJ_04995	M36	E433	MER001400	3.7e-158
VFPBJ_06544	M36	<E	MER001400	4.3e-35
VFPBJ_00202	M38	-345D	MER005900	6.9e-10
VFPBJ_00669	M38		MER037714	3.4e-57
VFPBJ_00836	M38	D347	MER005900	4.9e-32
VFPBJ_03937	M38		MER037714	2.7e-48
VFPBJ_05010	M38	D411	MER005900	1.6e-29
VFPBJ_06550	M38	S283D	MER005900	1.3e-06
VFPBJ_06779	M38	S346D	MER033184	2.3e-79
VFPBJ_08631	M38	D630	MER004801	4.5e-150
VFPBJ_08989	M38	>D	MER005900	3.4e-06
VFPBJ_09099	M38	D344	MER005900	9.8e-74
VFPBJ_10129	M38	D245	MER061068	2.2e-39
VFPBJ_10351	M38	D389	MER005900	6.7e-31
VFPBJ_10607	M38	D349	MER030136	6.1e-12
VFPBJ_05513	M41	E523	MER002197	3.5e-53
VFPBJ_07885	M41	E681	MER002605	4.9e-90
VFPBJ_02083	M43B	E198	MER011122	6.8e-43
VFPBJ_02629	M43B	E198	MER011122	6.7e-41
VFPBJ_02716	M43B	E197	MER029657	3.9e-41
VFPBJ_06065	M48A	E345	MER002635	2.3e-77
VFPBJ_10073	M48C	E218	MER026545	5e-39
VFPBJ_04438	M49	E447	MER004247	2.8e-65
VFPBJ_07785	M49	E430	MER011350	3.8e-44
VFPBJ_00758	M67A	P45E	MER030137	4.2e-15
VFPBJ_02559	M67A	E73	MER022069	1e-94
VFPBJ_05979	M67A	R41E	MER030134	2e-44
VFPBJ_08680	M67A	E55	MER022005	1.3e-88
VFPBJ_10392	M67C	E343	MER030146	1.3e-37
VFPBJ_01374	M67X	A35E	MER021886	1.7e-21
VFPBJ_10030	M67X	A54E	MER030133	5e-37
VFPBJ_03310	M76	E160	MER127117	1.4e-45
VFPBJ_05217	M77		MER066227	8.1e-35
VFPBJ_02694	M79		MER004246	8e-23
VFPBJ_04373	M80	E103	MER215828	2.2e-19
VFPBJ_05205	M80	E262	MER215827	9.7e-36
VFPBJ_08426	M80	E98	MER215799	1.3e-27
VFPBJ_04714	M81		MER167712	7.5e-12
VFPBJ_04936	P01	S260	MER004893	4.1e-24
VFPBJ_10993	P01	S272	MER004893	1.8e-19
VFPBJ_00842	S01A	H163, D210, S286	MER000265	9.8e-09
VFPBJ_08960	S01A		MER090510	4.7e-05
VFPBJ_10090	S01A	H77, D123, S218	MER000073	7.6e-57
VFPBJ_00953	S01C	H123, D154, X237S	MER003297	3.2e-53
VFPBJ_08266	S01X	H59, D104, S180	MER133866	7.9e-13
VFPBJ_00050	S08A	D159, H208, N301, >S	MER047718	2.1e-59
VFPBJ_00213	S08A	D689, H725, N802, S875	MER081072	1.1e-17
VFPBJ_01072	S08A	D162, H211, N305, >S	MER047718	1.3e-56
VFPBJ_01597	S08A	<D, <H, N360, S468	MER016991	8.3e-34
VFPBJ_02466	S08A	D165, H214, N309, >S	MER047718	8.7e-61
VFPBJ_02510	S08A	D68, H122, X215N, >S	MER047718	8.2e-50
VFPBJ_03138	S08A	D173, H204, X296N, X359S	MER000338	4.4e-110
VFPBJ_03255	S08A	D169, H219, N312, >S	MER047718	1.5e-48
VFPBJ_03525	S08A	D163, H213, N306, >S	MER047718	3.9e-46
VFPBJ_04128	S08A	D161, X210H, N303, >S	MER047718	1.5e-52
VFPBJ_04917	S08A	D147, H178, N270, S333	MER000338	1.7e-71
VFPBJ_05170	S08A	D145, H175, G267N, X330S	MER000338	1.6e-86
VFPBJ_05207	S08A	D162, H193, N284, S355	MER000344	2.8e-86
VFPBJ_05277	S08A	D160, H209, N303, >S	MER047718	8.2e-55
VFPBJ_05484	S08A	D119, H150, N242, S305	MER000338	1.8e-79
VFPBJ_06203	S08A	D143, H174, N266, S329	MER000336	4.8e-122
VFPBJ_06273	S08A	D1283, X1314H, N1406, S1469	MER000338	4.3e-67
VFPBJ_06383	S08A	D303, P344H, X441N, >S	MER047718	1.7e-06
VFPBJ_06397	S08A	D136, H168, N260, S323	MER000338	3.4e-112
VFPBJ_06446	S08A	D148, H179, N276, S339	MER000338	1.8e-96
VFPBJ_07060	S08A	D402, H440, >N, >S	MER002764	4e-09
VFPBJ_07318	S08A	D155, L208H, D308N, >S	MER047718	1.3e-21
VFPBJ_07719	S08A	<D, H539, N636, S707	MER001520	1.2e-19
VFPBJ_07877	S08A	D644, H682, N771, S846	MER000309	3.2e-18
VFPBJ_07970	S08A	D150, H181, N273, S336	MER000338	7.4e-89
VFPBJ_08723	S08A	D175, H206, N297, S362	MER000344	4e-79
VFPBJ_08810	S08A	D172, H203, N295, S361	MER005078	2.5e-72
VFPBJ_09775	S08A	D151, H182, N273, S343	MER000344	6.4e-107
VFPBJ_10181	S08A	D3, H46, N140, >S	MER047718	2.7e-23
VFPBJ_10501	S08A	C162D, Q201H, N296, >S	MER047718	1.7e-17
VFPBJ_11002	S08A	D202, H234, N335, S400	MER000356	8.3e-122
VFPBJ_11551	S08A	<D, <H, N74, G136S	MER000310	1.2e-10
VFPBJ_11658	S08A	D129, H160, N252, S315	MER000338	2.3e-111
VFPBJ_08959	S08B	D190, H228, N328, S400	MER001604	7.8e-97
VFPBJ_02024	S09A	S306, D389, H422	MER005694	3e-58
VFPBJ_01381	S09B	S758, D835, H868	MER000405	1.6e-84
VFPBJ_04915	S09B	S622, D699, H734	MER004504	1.8e-96
VFPBJ_02030	S09C	S579, D666, H698	MER000263	2.8e-67
VFPBJ_02062	S09C	S150, D246, H276	MER043003	6e-11
VFPBJ_02595	S09C	S195, >D, >H	MER043003	1.2e-11
VFPBJ_04341	S09C	S548, D629, H661	MER000263	7e-100
VFPBJ_07477	S09C	S162, >D, >H	MER036030	9.3e-15
VFPBJ_07755	S09C	S545, D625, H657	MER034615	5.8e-30
VFPBJ_08371	S09C	S184, D272, >H	MER017246	1.3e-11
VFPBJ_08697	S09C	S504, D591, H623	MER018170	6e-63
VFPBJ_10916	S09C	C172S, D261, >H	MER066184	9.8e-06
VFPBJ_00395	S09X	<S, D258, H290	MER208755	3.9e-07
VFPBJ_00408	S09X	S159, >D, >H	MER033242	1.4e-07
VFPBJ_00655	S09X	S202, >D, >H	MER033237	3.1e-13
VFPBJ_01212	S09X	L206S, >D, >H	MER034961	8.1e-10
VFPBJ_01471	S09X	S235, D354, H447	MER030934	6.2e-41
VFPBJ_01494	S09X	S159, D290, >H	MER030934	4.5e-34
VFPBJ_01795	S09X	S220, H341D, H438	MER030934	3.3e-32
VFPBJ_02158	S09X	S218, D348, >H	MER033235	8.5e-36
VFPBJ_02601	S09X	<S, A258D, H285	MER017248	2.8e-05
VFPBJ_02771	S09X	<S, D240, H272	MER213608	7.3e-05
VFPBJ_02808	S09X	S172, G260D, H302	MER034665	1.6e-50
VFPBJ_03075	S09X	S187, D262, H292	MER017242	4.5e-59
VFPBJ_03111	S09X	S65, D192, >H	MER033198	1.2e-28
VFPBJ_03398	S09X	S225, >D, >H	MER037861	4.4e-33
VFPBJ_03596	S09X	S151, D227, H262	MER043126	1.7e-77
VFPBJ_04683	S09X	S50, >D, >H	MER033235	5.6e-16
VFPBJ_04868	S09X	S132, D264, H296	MER213608	1.5e-07
VFPBJ_04906	S09X	>S, >D, >H	MER034961	1.6e-08
VFPBJ_04921	S09X	S141, >D, >H	MER213229	7.5e-08
VFPBJ_05023	S09X	S157, I247D, H289	MER034665	3e-43
VFPBJ_05185	S09X	C113S, >D, >H	MER048191	6.1e-06
VFPBJ_05201	S09X	L243S, >D, >H	MER034961	3e-05
VFPBJ_05229	S09X	S33, D167, >H	MER033241	4e-16
VFPBJ_05345	S09X	S297, >D, >H	MER033274	1.2e-17
VFPBJ_05372	S09X	S259, D390, >H	MER033188	5.4e-37
VFPBJ_05414	S09X	S245, >D, >H	MER033188	1.5e-15
VFPBJ_06126	S09X	S218, >D, >H	MER033188	1.3e-30
VFPBJ_06194	S09X	L214S, >D, >H	MER034961	1.8e-06
VFPBJ_06553	S09X	S261, E377D, E408H	MER048191	5.1e-06
VFPBJ_06749	S09X	S221, >D, >H	MER034959	1.7e-10
VFPBJ_06985	S09X	X193S, G288D, H330	MER034665	8.1e-20
VFPBJ_08319	S09X	S143, H265D, >H	MER033198	2.5e-18
VFPBJ_08978	S09X	S227, S443D, H471	MER037861	1.7e-36
VFPBJ_08979	S09X	S135, D257, >H	MER034744	2.8e-50
VFPBJ_09136	S09X	S198, N323D, H427	MER033198	3.8e-37
VFPBJ_09365	S09X	S179, D235, H267	MER200434	1.3e-22
VFPBJ_09537	S09X	S463, >D, >H	MER037861	1.7e-38
VFPBJ_09814	S09X	S166, >D, >H	MER034665	5.6e-12
VFPBJ_09817	S09X	S167, F288D, >H	MER033188	1.7e-39
VFPBJ_10460	S09X	S203, N327D, H432	MER033198	3.1e-39
VFPBJ_10577	S09X	S179, G283D, H325	MER034665	4.2e-15
VFPBJ_10900	S09X	S217, G334D, >H	MER030934	3.3e-24
VFPBJ_01520	S10	H246S, D465, H522	MER016549	4.4e-57
VFPBJ_02614	S10	S208, D427, H496	MER001944	9.8e-127
VFPBJ_03239	S10	S280, D472, H530	MER002010	4.2e-157
VFPBJ_05815	S10	S223, D409, H468	MER002010	7.9e-116
VFPBJ_06400	S10	S202, D393, H452	MER002010	4.8e-156
VFPBJ_06839	S10	S237, D452, H514	MER016549	2.1e-65
VFPBJ_06934	S10	S646, D856, H915	MER003541	1.1e-66
VFPBJ_09945	S10	S216, D428, H503	MER002512	1.2e-99
VFPBJ_09979	S10	S186, D384, H446	MER000413	8.9e-96
VFPBJ_10683	S10	S228, D439, H516	MER001944	5e-109
VFPBJ_00358	S12	<S, <K, Y221	MER004154	2.9e-13
VFPBJ_00362	S12	S63, K66, Y174	MER006204	1.5e-27
VFPBJ_02293	S12	S59, K62, Y170	MER006204	5.4e-27
VFPBJ_02482	S12	S92, K95, Y193	MER026262	7e-20
VFPBJ_02516	S12	S66, K69, Y173	MER006204	7.7e-21
VFPBJ_04237	S12	S62, K65, Y179	MER006204	2.3e-23
VFPBJ_04615	S12	<S, <K, Y53	MER006204	7e-21
VFPBJ_04638	S12	S417, K420, >Y	MER005925	4e-07
VFPBJ_04639	S12	<S, <K, Y33	MER026262	4.8e-06
VFPBJ_05262	S12	S341, K344, Y442	MER026262	1.2e-18
VFPBJ_05816	S12	<S, <K, Y117	MER006204	2.2e-07
VFPBJ_06201	S12	<S, <K, Y214	MER028284	7e-15
VFPBJ_06692	S12	S63, K66, Y174	MER002489	3.3e-13
VFPBJ_06866	S12	S68, K71, Y169	MER026262	3.1e-24
VFPBJ_06968	S12	<S, <K, Y227	MER004154	2.7e-10
VFPBJ_07112	S12	S144, K147, Y234	MER004090	5.7e-38
VFPBJ_08910	S12	D111S, M114K, V197Y	MER002489	1.2e-05
VFPBJ_09174	S12	S74, K77, Y167	MER026262	5.4e-30
VFPBJ_09832	S12	S67, K70, Y170	MER002489	1.9e-28
VFPBJ_09835	S12	<S, <K, Y261	MER026262	4.6e-06
VFPBJ_10996	S12	S115, K118, Y218	MER026262	1.2e-07
VFPBJ_09073	S14	S134, H159, D215	MER006046	2.3e-58
VFPBJ_01002	S16	S821, K864	MER000485	1.7e-52
VFPBJ_01854	S16	S994, K1037	MER000496	2.8e-86
VFPBJ_01904	S26A	S60, K106	MER000598	1.7e-22
VFPBJ_06237	S26A	S40, K86	MER000597	1.5e-19
VFPBJ_10718	S26B	S49, H90	MER000602	2.9e-37
VFPBJ_05024	S28	S193, D471, H502	MER093133	1.5e-38
VFPBJ_05220	S28	S221, D500, H533	MER093133	1.5e-161
VFPBJ_00145	S33	S226, D396, H422	MER208659	3.5e-37
VFPBJ_00171	S33	R96S, >D, >H	MER031610	7e-07
VFPBJ_00490	S33	S105, D247, H275	MER000437	3.1e-16
VFPBJ_00546	S33	S117, D243, H274	MER031618	3.1e-18
VFPBJ_00577	S33	D122S, Q214D, A278H	MER031610	5.6e-36
VFPBJ_01049	S33	S271, >D, >H	MER011785	5.1e-32
VFPBJ_01342	S33	S426, >D, >H	MER211636	5.3e-16
VFPBJ_01434	S33	S159, D407, H436	MER044357	2.4e-119
VFPBJ_01538	S33	S313, >D, >H	MER000440	2.7e-12
VFPBJ_01715	S33	S112, D228, H257	MER017193	4e-10
VFPBJ_01762	S33	S212, D445, H473	MER000440	3.4e-28
VFPBJ_01939	S33	S71, >D, >H	MER213595	1.7e-09
VFPBJ_02359	S33	S97, D227, H256	MER026339	3.6e-84
VFPBJ_02773	S33	S201, D335, H357	MER036069	6.3e-50
VFPBJ_03165	S33	S179, D422, H450	MER001367	4e-62
VFPBJ_03381	S33	D116S, D284, H311	MER017177	2.6e-42
VFPBJ_03537	S33	S724, >D, >H	MER000440	3.1e-12
VFPBJ_03916	S33	D101S, E227D, H256	MER031617	1.4e-16
VFPBJ_04467	S33	S153, D280, >H	MER037236	5.6e-12
VFPBJ_04578	S33	S116, >D, >H	MER031611	2.6e-06
VFPBJ_04581	S33	S172, >D, >H	MER209971	4.3e-09
VFPBJ_04918	S33	S88, >D, >H	MER000440	1.3e-13
VFPBJ_05030	S33	D102S, >D, >H	MER017123	6.9e-05
VFPBJ_05104	S33	S125, >D, >H	MER044357	1e-10
VFPBJ_05358	S33	P377S, >D, >H	MER031610	3.1e-05
VFPBJ_06119	S33	S144, >D, >H	MER036083	3e-14
VFPBJ_06207	S33	S212, D451, H479	MER004231	1.3e-28
VFPBJ_06374	S33	>S, >D, >H	MER017177	6.9e-06
VFPBJ_06376	S33	S156, >D, >H	MER036083	8.5e-09
VFPBJ_06391	S33	S125, >D, >H	MER044357	1.1e-08
VFPBJ_06394	S33	>S, >D, >H	MER004231	4.2e-09
VFPBJ_06404	S33	D105S, P276D, H303	MER017177	5.3e-24
VFPBJ_06673	S33	D102S, >D, >H	MER017177	9.5e-13
VFPBJ_06744	S33	S138, >D, >H	MER209971	1.5e-06
VFPBJ_07156	S33	P10S, >D, >H	MER033263	2.5e-05
VFPBJ_07512	S33	S230, >D, >H	MER044357	4.1e-32
VFPBJ_07625	S33	S135, D277, H306	MER025512	2e-16
VFPBJ_07798	S33	G188S, >D, >H	MER000432	4.9e-05
VFPBJ_07852	S33	S217, D346, H375	MER059846	1.1e-28
VFPBJ_08216	S33	S241, >D, >H	MER036062	2.3e-06
VFPBJ_08698	S33	S321, >D, >H	MER004231	2.4e-21
VFPBJ_08828	S33	S137, >D, >H	MER210990	1.3e-16
VFPBJ_09239	S33	S166, D316, H344	MER044899	1.2e-12
VFPBJ_09525	S33	D175S, D349, H375	MER000432	1.1e-49
VFPBJ_09607	S33	D499S, >D, >H	MER017177	3e-10
VFPBJ_09645	S33	D172S, D344, H370	MER000432	3.7e-50
VFPBJ_09859	S33	>S, >D, >H	MER000440	2.6e-12
VFPBJ_10569	S33	S242, D480, H508	MER000440	4.4e-34
VFPBJ_10733	S33	S151, >D, >H	MER044357	9.2e-16
VFPBJ_11131	S33	D101S, >D, >H	MER014065	1e-15
VFPBJ_02276	S53	<E, <D, D417, S550	MER005329	1.1e-72
VFPBJ_02316	S53	<E, <D, D408, S520	MER078639	9.8e-56
VFPBJ_02988	S53	<E, <D, D431, S564	MER005329	1.4e-66
VFPBJ_06107	S53	D279E, A283D, X373D, S490	MER078639	1.8e-79
VFPBJ_08970	S53	E323, D327, D452, S601	MER005329	7.8e-133
VFPBJ_09049	S53	E283, D287, X375D, S491	MER078639	8.2e-67
VFPBJ_09215	S53	<E, <D, X370D, S487	MER078639	1.3e-39
VFPBJ_10666	S53	K237E, E241D, D358, S491	MER005329	7.4e-89
VFPBJ_11336	S53	L327E, G331D, D449, S582	MER005329	8.7e-75
VFPBJ_02927	S54	S452, H511	MER015472	8e-21
VFPBJ_07206	S54	-157S, H209	MER034660	1.2e-09
VFPBJ_06870	S59	H1050, T1052S	MER020214	1.1e-31
VFPBJ_00916	T01A	S43T	MER000558	7.4e-72
VFPBJ_01392	T01A	T30	MER001645	2.6e-74
VFPBJ_02798	T01A	<T	MER000553	3.6e-29
VFPBJ_03034	T01A	T30	MER000542	1.6e-80
VFPBJ_03220	T01A	T69	MER001516	2e-97
VFPBJ_03446	T01A		MER004372	1.1e-66
VFPBJ_04120	T01A		MER001710	7.2e-68
VFPBJ_04209	T01A	T42	MER001711	6.8e-43
VFPBJ_04274	T01A	S43T	MER005692	1.5e-61
VFPBJ_05061	T01A		MER000554	1.3e-54
VFPBJ_07647	T01A	S33T	MER000549	1.4e-62
VFPBJ_07863	T01A	K59T	MER002676	3.4e-40
VFPBJ_09301	T01A		MER000557	2.3e-41
VFPBJ_04600	T01X	T33	MER004996	9e-45
VFPBJ_05012	T02	T235	MER003299	2.4e-23
VFPBJ_05917	T02	>T	MER017622	1.8e-20
VFPBJ_02182	T03	T407	MER223926	2.2e-37
VFPBJ_05921	T03	T363	MER001629	3.5e-97
VFPBJ_06386	T03	T398	MER223926	2.4e-39
VFPBJ_09201	T03	T378	MER003580	7.3e-106
VFPBJ_07776	T05	T214	MER011829	5e-56

## Sheet: Table S8C
Table S8C Description of putative proteases PLFJ-1.
GeneID	Family	Predicted active site residues	HitID	e-value
VFPFJ_00056	A01A	D88, Y132, D280	MER080922	1.2e-56
VFPFJ_00430	A01A	D100, Y150, D303	MER080922	1.5e-144
VFPFJ_00763	A01A	S61D/H, K109F/S/Y, >D	MER000936	1.3e-07
VFPFJ_01204	A01A	D86, Y134, D279	MER002153	8.7e-58
VFPFJ_01679	A01A	D82, I128F/S/Y, D274	MER080922	1.5e-61
VFPFJ_01810	A01A	D103, Y146, D284	MER000941	2.5e-127
VFPFJ_02087	A01A	D59, Y103, D244	MER003037	1.4e-83
VFPFJ_02451	A01A	D155, Y203, D370	MER080922	4.6e-46
VFPFJ_03796	A01A	D164, Y207, D344	MER078983	1.4e-66
VFPFJ_04757	A01A	D122, Y166, D305	MER000928	6.9e-98
VFPFJ_04946	A01A	D123, F231, D337	MER090759	3.1e-62
VFPFJ_05897	A01A	D129, Y173, D315	MER000928	1.4e-85
VFPFJ_05975	A01A	D84, Y137, D281	MER000935	1.3e-33
VFPFJ_06775	A01A	D102, Y149, D289	MER000928	1.1e-53
VFPFJ_07411	A01A	S80D/H, M130F/S/Y, >D	MER080922	1.7e-15
VFPFJ_07441	A01A	G50D/H, Y103, P242D	MER000938	1.8e-11
VFPFJ_08144	A01A	D86, Y130, D278	MER080922	6.8e-60
VFPFJ_08926	A01A	D73, Y134, D285	MER005350	4.4e-33
VFPFJ_09329	A01A	D177, Y221, D363	MER006243	1.9e-70
VFPFJ_09419	A01A	<D/H, <F/S/Y, <D	MER005644	8.8e-06
VFPFJ_10230	A01A	D107, Y151, X291D	MER000928	6.4e-107
VFPFJ_10252	A01A	D124, Y168, D309	MER000928	3.9e-77
VFPFJ_11034	A01A	D120, Y164, X299D	MER000928	1.2e-86
VFPFJ_00217	A22B	D312, D350	MER014430	2.1e-20
VFPFJ_00946	A28	D593	MER030081	1.8e-46
VFPFJ_04474	C01A	<Q, <C, <H, >N/Q	MER002752	4.5e-05
VFPFJ_00252	C01B	Q119, C125, H430, N453	MER002481	3.5e-97
VFPFJ_05885	C02A	<Q, <C, H369, N390	MER019360	1.7e-26
VFPFJ_06623	C02A	Q163, C169, H336, N357	MER005406	2.6e-66
VFPFJ_09706	C02A	<Q, <C, H368, N388	MER019360	4.7e-23
VFPFJ_00163	C12	Q101, C107, H181, D197	MER000836	6.8e-43
VFPFJ_00560	C12	Q508, C514, H589, D604	MER013494	3.2e-70
VFPFJ_02245	C12	Q326, C332, >H, >D	MER015601	1.1e-21
VFPFJ_03764	C12	Q104, C110, H184, E200D	MER000836	2.7e-27
VFPFJ_11178	C12	Q91, C97, H168, >D	MER000841	1.2e-17
VFPFJ_11716	C12	Q91, C97, H156, D173	MER015672	5.8e-23
VFPFJ_00838	C13	H147, C189	MER002477	3.6e-118
VFPFJ_01454	C14B	H315, C375	MER039457	3.9e-05
VFPFJ_02248	C14B	H227, C283	MER114503	4.5e-78
VFPFJ_06154	C14B	H260, C316	MER114503	5.7e-72
VFPFJ_11247	C14B	H104, C163	MER039482	1.3e-11
VFPFJ_11701	C14B	<H, C545	MER114503	1.6e-23
VFPFJ_05288	C15	E110, C183, H207	MER011032	9.3e-14
VFPFJ_01195	C19	N1633, C1638, >H, >D/N	MER185433	3e-57
VFPFJ_02175	C19	N605, C610, >H, >N/D	MER000865	7.4e-13
VFPFJ_02317	C19	A185N, Y190C, H472, N487	MER012131	4.3e-53
VFPFJ_02654	C19	I492N, S497C, >H, >D/N	MER030317	9.8e-14
VFPFJ_02945	C19	N113, C118, >H, >D/N	MER000757	2.6e-57
VFPFJ_03375	C19	<N, <C, H438, D454	MER004311	2.4e-81
VFPFJ_04515	C19	N408, C413, H734, D751	MER005436	9.3e-85
VFPFJ_05197	C19	<N, <C, H450, D473	MER005855	7.9e-15
VFPFJ_05435	C19	N1600, C1605, >H, >D/N	MER001879	1.4e-72
VFPFJ_07798	C19	N232, C237, H480, D497	MER002179	3.4e-129
VFPFJ_07998	C19	N215, D220C, V358H, V358N/D	MER064621	1.1e-66
VFPFJ_08090	C19	<N, <C, >H, >D/N	MER000864	5.9e-27
VFPFJ_09232	C19	N598, C603, H902, N922	MER001884	1.7e-31
VFPFJ_09682	C19	<N, <C, H734, N754	MER001881	1.2e-66
VFPFJ_00771	C26		MER060647	9.3e-102
VFPFJ_00849	C26	D360C, P446H, >E	MER046161	2.8e-98
VFPFJ_01182	C26	C402, H531, E533	MER437468	5.8e-93
VFPFJ_01288	C26	C104, H198, E200	MER045094	2.4e-81
VFPFJ_01509	C26	C164, H250, E252	MER043475	1.5e-23
VFPFJ_01691	C26	C104, >H, >E	MER066916	1.2e-27
VFPFJ_01974	C26	C93, H186, E188	MER045886	4.2e-87
VFPFJ_04615	C26	C97, H192, E194	MER044622	2.6e-33
VFPFJ_04647	C26	C122, H224, A226E	MER043475	1.2e-11
VFPFJ_07571	C26	C112, H198, E200	MER043475	1.3e-22
VFPFJ_08216	C26	C119, >H, >E	MER045095	5.8e-18
VFPFJ_08502	C26	C81, H188, E190	MER065588	1.4e-29
VFPFJ_11004	C26	C101, H184, E186	MER043475	9.1e-09
VFPFJ_04778	C40	C68, H125, N137	MER003807	3.7e-16
VFPFJ_09714	C40	C247, H304, E316H/N	MER014188	1e-14
VFPFJ_03417	C44	C2	MER012158	2.1e-67
VFPFJ_07016	C44	C2	MER011806	1.6e-27
VFPFJ_07201	C44	C54	MER198917	1.8e-71
VFPFJ_09366	C44	C2	MER034539	1e-49
VFPFJ_07470	C45	C101	MER004220	3.5e-46
VFPFJ_04898	C48	H1075, D1092, Q1133, C1139	MER005202	1.1e-17
VFPFJ_07985	C48	H733, D800, Q844, C850	MER011024	1.1e-40
VFPFJ_01244	C50	H1931, C1958	MER010982	6.3e-73
VFPFJ_02300	C54	Y141, C184, D357, H359	MER013559	2e-61
VFPFJ_01550	C56	C139E, H140C	MER031431	1.7e-35
VFPFJ_03897	C56	A1113E, F1147C, S1148H	MER042827	5.8e-24
VFPFJ_04716	C56	L186E, C187	MER038141	1.5e-38
VFPFJ_09636	C56	R88E, C114, T115H	MER002455	4.2e-09
VFPFJ_09656	C56	V128E, C156, T157H	MER014721	3.4e-06
VFPFJ_10691	C56	C135E, H136C	MER031431	9.3e-15
VFPFJ_10793	C56	C136E, H137C	MER031431	3e-10
VFPFJ_06217	C65	D364, C367, H560	MER029056	7e-35
VFPFJ_08541	C85A	D200, C203, H328	MER400048	8.9e-16
VFPFJ_02311	C85B	D122, C125, H226	MER116559	4.6e-24
VFPFJ_03160	C97	H52, C128	MER308294	1.6e-27
VFPFJ_08175	C97	H32, C100	MER323972	5.7e-32
VFPFJ_04350	G01	Q113, E195	MER003426	3.3e-55
VFPFJ_05540	G01	Q87, E170	MER003426	1e-41
VFPFJ_05757	G01	Q102, E184	MER003426	4.1e-64
VFPFJ_06373	G01	Q95, E180	MER001321	1.9e-19
VFPFJ_10676	G01	Q103, E186	MER001320	3.7e-33
VFPFJ_10763	G01	Q67, E150	MER001320	3.3e-36
VFPFJ_00661	I09		MER018320	3e-07
VFPFJ_06659	I09		MER018320	3e-05
VFPFJ_07332	I17		MER018542	3.9e-05
VFPFJ_04607	I20		MER018777	6.7e-05
VFPFJ_06294	I32		MER018608	3.1e-14
VFPFJ_02875	I51		MER018285	5.1e-12
VFPFJ_10328	I51		MER029866	4.6e-14
VFPFJ_03116	I78		MER059865	3.9e-05
VFPFJ_04051	I87		MER192051	1.4e-11
VFPFJ_06782	I87		MER192051	1.9e-09
VFPFJ_07276	M01	E323, Y408	MER001010	9.2e-75
VFPFJ_07561	M01	E330, Y415	MER001010	4.5e-95
VFPFJ_08697	M01	E356, Y443	MER002281	4e-79
VFPFJ_10050	M01	T451E, >Y	MER026493	3.4e-14
VFPFJ_05375	M03A	>E	MER001156	3.8e-66
VFPFJ_06290	M03A	E485	MER003110	1.3e-194
VFPFJ_06504	M03A	E451	MER003110	1.5e-76
VFPFJ_07345	M03A	E465	MER003110	5e-128
VFPFJ_08361	M03A	E480	MER003110	2e-148
VFPFJ_04048	M04	I235E, M336H	MER115298	2.4e-81
VFPFJ_06449	M10A	E159	MER156574	2.5e-25
VFPFJ_09541	M10A	E257	MER012071	5.7e-20
VFPFJ_06999	M12B	E426	MER182135	1.7e-29
VFPFJ_11470	M12B	E424	MER182135	1.3e-32
VFPFJ_11651	M12B	E412	MER182135	5.8e-33
VFPFJ_00591	M14A	R313, K477E	MER003908	9.3e-49
VFPFJ_10668	M14A	R238, E386	MER003908	9.8e-127
VFPFJ_10889	M14A	R201, >E	MER011311	1.1e-22
VFPFJ_04755	M16B	D98E, Q168E	MER001229	2e-30
VFPFJ_07094	M16B	A93E, V164E	MER003544	2e-13
VFPFJ_09117	M16B	E86, E156	MER001229	9.8e-74
VFPFJ_06574	M16C	E87, E160	MER015270	1.7e-130
VFPFJ_06577	M16C	E67, E139	MER003909	2.8e-93
VFPFJ_05810	M18	D87, E305	MER003372	3.6e-82
VFPFJ_08117	M18	D204, E420	MER001255	2.9e-107
VFPFJ_07742	M19		MER011422	1.5e-59
VFPFJ_11096	M19		MER011343	2.5e-70
VFPFJ_00494	M20A	D466, E526	MER003798	2.9e-26
VFPFJ_01666	M20A	D144, E210	MER001269	1.1e-91
VFPFJ_09738	M20A	D175, E242	MER001269	7.6e-93
VFPFJ_10335	M20A	D160, E229	MER003798	1.2e-09
VFPFJ_10439	M20A	D93, E160	MER003798	3.3e-16
VFPFJ_10626	M20A	D174, E239	MER001269	3.6e-101
VFPFJ_04368	M20D	D87E	MER002007	5.6e-53
VFPFJ_06096	M20D	E148	MER014418	5.5e-51
VFPFJ_08398	M20D	E157	MER014418	1.2e-44
VFPFJ_09626	M20D	E155	MER014418	2e-11
VFPFJ_10275	M20D	E189	MER014418	5.8e-40
VFPFJ_10363	M20D	E132	MER014418	1.1e-49
VFPFJ_11003	M20D	E148	MER014418	1.4e-34
VFPFJ_11754	M20D	D98E	MER002655	4.7e-48
VFPFJ_04200	M20F	D504, X569E	MER026494	6.7e-44
VFPFJ_09461	M20F	D100, E166	MER026471	6.3e-158
VFPFJ_04563	M24A	H193	MER001728	2.8e-122
VFPFJ_08931	M24A	H206	MER001342	1e-98
VFPFJ_10208	M24A	H223	MER001728	7.2e-104
VFPFJ_00070	M24B	H244, H351, H362	MER001733	1.6e-69
VFPFJ_02629	M24B	H311, H411, H422	MER005715	1.6e-48
VFPFJ_04033	M24B	H320, H422, H433	MER013463	3e-60
VFPFJ_04668	M24B	F83H, P172H, H183	MER002038	2.1e-09
VFPFJ_04817	M24B	H261, H368, H379	MER001733	3.1e-27
VFPFJ_06635	M24B	H395, H485, H498	MER003105	1.1e-87
VFPFJ_09740	M24B	R236H, N322H, S333H	MER004931	1.3e-21
VFPFJ_05479	M24X	<H	MER005497	2.1e-25
VFPFJ_09427	M24X	G270H	MER026495	4.5e-50
VFPFJ_01046	M28A	D237, E288	MER032443	2.9e-39
VFPFJ_06394	M28A	D191, E246	MER032443	1.5e-97
VFPFJ_08423	M28A	D190, E239	MER032443	1.6e-52
VFPFJ_09760	M28A	V315D, D356E	MER001288	1.2e-48
VFPFJ_10041	M28A	D131, E190	MER015094	7.6e-57
VFPFJ_10537	M28A	X623D, A664E	MER001288	2.1e-25
VFPFJ_11514	M28A	X136D, A177E	MER001288	9e-26
VFPFJ_03135	M28B	I532D, L573E	MER015691	2.9e-49
VFPFJ_09041	M28B	I413D, L455E	MER015691	1.5e-53
VFPFJ_01742	M28X	D197, E241	MER001911	1.9e-40
VFPFJ_05655	M28X	D365, E409	MER001911	2.5e-37
VFPFJ_00058	M35	E301	MER001399	1.5e-42
VFPFJ_04289	M35	E306	MER001399	2.4e-49
VFPFJ_05825	M35	E319	MER014227	4.4e-14
VFPFJ_10467	M35	E303	MER001394	3.2e-32
VFPFJ_10549	M35	E383	MER001399	5.2e-11
VFPFJ_10638	M35	E298	MER001394	8.5e-16
VFPFJ_03004	M36	<E	MER001400	2.7e-34
VFPFJ_04192	M36	E433	MER001400	3.7e-158
VFPFJ_00228	M38	-345D	MER005900	5.2e-10
VFPFJ_00701	M38		MER037714	5e-56
VFPFJ_00871	M38	D347	MER005900	4.9e-32
VFPFJ_01788	M38	D389	MER005900	6.7e-31
VFPFJ_02061	M38	D349	MER030136	6.1e-12
VFPFJ_02760	M38	S346D	MER033184	2.3e-79
VFPFJ_02998	M38	S283D	MER005900	1.3e-06
VFPFJ_03149	M38		MER037714	1.1e-47
VFPFJ_04207	M38	D411	MER005900	1.7e-29
VFPFJ_08747	M38	D245	MER061068	2.2e-39
VFPFJ_09843	M38	D630	MER004801	4.5e-150
VFPFJ_10203	M38	>D	MER005900	3.4e-06
VFPFJ_07134	M41	E606	MER002197	6.3e-53
VFPFJ_07961	M41	E681	MER002605	4.9e-90
VFPFJ_04799	M43B	E198	MER011122	6.7e-41
VFPFJ_04892	M43B	E197	MER029657	3.9e-41
VFPFJ_06509	M43B	E198	MER011122	6.8e-43
VFPFJ_06576	M48A	E345	MER002635	2.3e-77
VFPFJ_08691	M48C	E218	MER026545	5e-39
VFPFJ_03651	M49	E447	MER004247	2.8e-65
VFPFJ_08065	M49	E831	MER011350	1.3e-43
VFPFJ_00789	M67A	P45E	MER030137	4.2e-15
VFPFJ_04731	M67A	E73	MER022069	1e-94
VFPFJ_06664	M67A	R41E	MER030134	2e-44
VFPFJ_09892	M67A	E55	MER022005	1.3e-88
VFPFJ_01841	M67C	E342	MER030146	1.3e-37
VFPFJ_01395	M67X	A35E	MER021886	1.7e-21
VFPFJ_08645	M67X	A54E	MER030133	5e-37
VFPFJ_05486	M76	E160	MER127117	1.4e-45
VFPFJ_07433	M77		MER066227	8.1e-35
VFPFJ_04868	M79		MER004246	3.4e-21
VFPFJ_03579	M80	E103	MER215828	2.2e-19
VFPFJ_07445	M80	E262	MER215827	9.7e-36
VFPFJ_09019	M80	E98	MER215799	1.3e-27
VFPFJ_03914	M81		MER167712	7.5e-12
VFPFJ_04131	P01	S260	MER004893	4.1e-24
VFPFJ_06200	P01	S272	MER004893	7.8e-21
VFPFJ_00878	S01A	H106, D153, S229	MER000265	1.1e-10
VFPFJ_08708	S01A	H77, D123, S218	MER000073	7.6e-57
VFPFJ_10176	S01A		MER090510	1.6e-05
VFPFJ_00987	S01C	H123, D154, X237S	MER003297	3.2e-53
VFPFJ_11718	S01C	H75, D106, >S	MER003297	4.3e-17
VFPFJ_07588	S01X	H59, D104, S180	MER133866	5.8e-13
VFPFJ_00077	S08A	D159, H208, N301, >S	MER047718	2.1e-59
VFPFJ_00239	S08A	D689, H725, N802, S875	MER081072	1.1e-17
VFPFJ_01098	S08A	D162, H211, N305, >S	MER047718	1.3e-56
VFPFJ_01630	S08A	<D, <H, N360, S468	MER016991	5.1e-34
VFPFJ_01956	S08A	C162D, Q201H, N296, >S	MER047718	1.8e-20
VFPFJ_02205	S08A	D155, L208H, D308N, >S	MER047718	1.3e-21
VFPFJ_02476	S08A	D434, H472, >N, >S	MER000335	4.2e-07
VFPFJ_03339	S08A	D161, X210H, N303, >S	MER047718	1.5e-53
VFPFJ_04111	S08A	D147, H178, N270, S333	MER000338	1.7e-71
VFPFJ_04639	S08A	D165, H214, N309, >S	MER047718	8.7e-61
VFPFJ_04682	S08A	-54D, H106, X199N, >S	MER047718	7.3e-44
VFPFJ_05319	S08A	D147, H178, X270N, X333S	MER000338	4.4e-110
VFPFJ_05432	S08A	D169, H219, N312, >S	MER047718	9.8e-49
VFPFJ_05712	S08A	D163, H213, N306, >S	MER047718	3.9e-46
VFPFJ_06163	S08A	D764, R809H, N906, S969	MER000320	2.5e-07
VFPFJ_06190	S08A	D202, H234, N335, S400	MER000356	8.3e-122
VFPFJ_07166	S08A	D134, H165, N257, S320	MER000338	1.8e-79
VFPFJ_07369	S08A	D160, H209, N303, >S	MER047718	8.8e-55
VFPFJ_07443	S08A	D162, H193, N284, S355	MER000344	2.8e-86
VFPFJ_07481	S08A	D145, H175, G267N, X330S	MER000338	3.3e-91
VFPFJ_07879	S08A	D150, H181, N273, S336	MER000338	7.4e-89
VFPFJ_07969	S08A	D642, H680, N793, S868	MER067924	1e-11
VFPFJ_08127	S08A	<D, H539, N620, S691	MER001520	8.1e-20
VFPFJ_08389	S08A	D151, H182, N273, S343	MER000344	6.4e-107
VFPFJ_09931	S08A	D175, H206, N297, S362	MER000344	4e-79
VFPFJ_10020	S08A	D172, H203, N295, S361	MER005078	2.5e-72
VFPFJ_10392	S08A	D303, P344H, X441N, >S	MER047718	2.3e-06
VFPFJ_10407	S08A	D147, H178, N270, S333	MER000338	1.3e-113
VFPFJ_10458	S08A	D148, H179, N276, S339	MER000338	3.5e-97
VFPFJ_10622	S08A	D143, H174, N266, S329	MER000336	4.8e-122
VFPFJ_10694	S08A	D148, X179H, N271, S334	MER000338	1.4e-68
VFPFJ_10970	S08A	D142, H173, N265, S328	MER000336	7.1e-119
VFPFJ_11360	S08A	D144, H174, N266, S329	MER000336	7.3e-106
VFPFJ_11448	S08A	D28, H70, N155, S226	MER000313	2.6e-20
VFPFJ_11657	S08A	D634, H679, N764, S829	MER042897	5.5e-17
VFPFJ_10175	S08B	D190, H228, N328, S400	MER001604	7.8e-97
VFPFJ_06451	S09A	S306, D389, H422	MER005694	1.3e-58
VFPFJ_01402	S09B	S758, D835, H868	MER000405	7.1e-85
VFPFJ_04110	S09B	S622, D699, H734	MER004504	1.8e-96
VFPFJ_03129	S09C	C172S, D261, >H	MER066184	9.8e-06
VFPFJ_03547	S09C	S548, D629, H661	MER000263	7e-100
VFPFJ_04764	S09C	S195, >D, >H	MER043003	1.2e-11
VFPFJ_06457	S09C	S579, D666, H698	MER000263	2.8e-67
VFPFJ_06489	S09C	S150, D246, H276	MER043003	6e-11
VFPFJ_08094	S09C	S545, D625, H657	MER034615	5.8e-30
VFPFJ_08964	S09C	S184, D272, >H	MER017246	1.3e-11
VFPFJ_09907	S09C	S504, D591, H623	MER018170	3.5e-63
VFPFJ_11300	S09C	S162, >D, >H	MER036030	5e-15
VFPFJ_00424	S09X	<S, D258, H290	MER208755	3.9e-07
VFPFJ_00436	S09X	S210, >D, >H	MER033242	1.8e-07
VFPFJ_00687	S09X	S202, >D, >H	MER033237	3.1e-13
VFPFJ_01236	S09X	L206S, >D, >H	MER034961	8.1e-10
VFPFJ_01500	S09X	S235, D354, H447	MER030934	3.5e-41
VFPFJ_01523	S09X	S159, D290, >H	MER030934	4.5e-34
VFPFJ_01909	S09X	S203, N327D, H432	MER033198	9.7e-39
VFPFJ_02032	S09X	S179, G283D, H325	MER034665	4.2e-15
VFPFJ_02556	S09X	X193S, G288D, H330	MER034665	8.1e-20
VFPFJ_02791	S09X	S221, >D, >H	MER034959	1.7e-10
VFPFJ_02995	S09X	S229, E345D, E376H	MER048191	1.5e-06
VFPFJ_03111	S09X	S217, G334D, >H	MER030934	3.3e-24
VFPFJ_03886	S09X	S232, >D, >H	MER033236	6.5e-24
VFPFJ_04063	S09X	S132, D265, H297	MER213608	1.5e-10
VFPFJ_04101	S09X	>S, >D, >H	MER034961	2.1e-08
VFPFJ_04114	S09X	S141, >D, >H	MER213229	1.7e-07
VFPFJ_04222	S09X	S157, I247D, H289	MER034665	4.6e-44
VFPFJ_04329	S09X	S218, D348, >H	MER033235	8.5e-36
VFPFJ_04770	S09X	<S, A258D, H285	MER017248	2.8e-05
VFPFJ_04986	S09X	S172, G260D, H302	MER034665	2.4e-49
VFPFJ_05256	S09X	S187, D262, H292	MER017242	7.7e-59
VFPFJ_05292	S09X	S65, D192, >H	MER033198	1.2e-28
VFPFJ_05580	S09X	S238, N364D, >H	MER033188	2.2e-26
VFPFJ_05784	S09X	S151, D227, H262	MER043126	1.7e-77
VFPFJ_07237	S09X	S245, >D, >H	MER033188	1.6e-15
VFPFJ_07275	S09X	S259, D390, >H	MER033188	5.4e-37
VFPFJ_07300	S09X	S297, >D, >H	MER033274	1.2e-17
VFPFJ_07421	S09X	S33, D167, >H	MER033241	4e-16
VFPFJ_07450	S09X	L243S, >D, >H	MER034961	2.9e-05
VFPFJ_07466	S09X	C113S, >D, >H	MER048191	4.6e-06
VFPFJ_07537	S09X	S269, H391D, >H	MER033198	3.1e-18
VFPFJ_08429	S09X	S166, >D, >H	MER034665	5.6e-12
VFPFJ_08432	S09X	S148, F269D, >H	MER033188	3.8e-39
VFPFJ_09245	S09X	S198, N323D, H427	MER033198	1.5e-36
VFPFJ_09476	S09X	S179, D235, H267	MER200434	1e-22
VFPFJ_09645	S09X	S463, >D, >H	MER037861	1.7e-38
VFPFJ_10194	S09X	S227, S443D, H471	MER037861	1e-35
VFPFJ_10195	S09X	S135, D257, >H	MER034745	1.2e-50
VFPFJ_10311	S09X	S220, H341D, H438	MER030934	3.3e-32
VFPFJ_10794	S09X	S218, >D, >H	MER033188	1.3e-30
VFPFJ_11523	S09X	S176, K271D, H313	MER034665	1.3e-18
VFPFJ_01549	S10	H246S, D465, H522	MER016549	4.4e-57
VFPFJ_02609	S10	S646, D856, H915	MER003541	3.5e-68
VFPFJ_02700	S10	S237, D452, H514	MER016549	2.1e-65
VFPFJ_04784	S10	S208, D427, H496	MER001944	1.9e-125
VFPFJ_05416	S10	S280, D472, H530	MER002010	4.2e-157
VFPFJ_06831	S10	S223, D409, H468	MER002010	7.9e-116
VFPFJ_08558	S10	S216, D428, H503	MER002512	1.2e-99
VFPFJ_08594	S10	S186, D384, H446	MER000413	8.9e-96
VFPFJ_10410	S10	S202, D393, H452	MER002010	4.8e-156
VFPFJ_10515	S10	S228, D439, H516	MER001944	5e-109
VFPFJ_10695	S10	S217, D428, >H	MER003541	2.8e-55
VFPFJ_00387	S12	<S, <K, Y221	MER004154	2.9e-13
VFPFJ_00391	S12	S63, K66, Y174	MER006204	5.4e-27
VFPFJ_02418	S12	S144, K147, Y234	MER004090	1.1e-38
VFPFJ_02573	S12	<S, <K, Y227	MER004154	2.7e-10
VFPFJ_02674	S12	<S, <K, Y558	MER026262	6.5e-14
VFPFJ_02851	S12	S63, K66, Y174	MER026262	1.1e-13
VFPFJ_03446	S12	S62, K65, Y179	MER006204	2.3e-23
VFPFJ_03823	S12	<S, <K, Y53	MER006204	7e-21
VFPFJ_03838	S12	S61, K64, Y160	MER002489	8.8e-14
VFPFJ_04466	S12	S59, K62, Y170	MER006204	5.4e-27
VFPFJ_04655	S12	S92, K95, Y193	MER026262	2.2e-18
VFPFJ_04688	S12	S66, K69, Y173	MER006204	7.7e-21
VFPFJ_06197	S12	S115, K118, Y218	MER026262	1.2e-07
VFPFJ_06830	S12	<S, <K, Y141	MER006204	2.4e-07
VFPFJ_07384	S12	S97, K100, Y198	MER026262	9.2e-18
VFPFJ_08449	S12	S67, K70, Y170	MER002489	1.6e-27
VFPFJ_08452	S12	<S, <K, Y267	MER026262	8.6e-06
VFPFJ_09283	S12	S74, K77, Y167	MER026262	5.4e-30
VFPFJ_10120	S12	D111S, M114K, V197Y	MER002489	4.8e-05
VFPFJ_10310	S12	<S, <K, Y247	MER004090	1.7e-06
VFPFJ_10620	S12	<S, <K, Y176	MER028284	2.7e-15
VFPFJ_09183	S14	S134, H159, D215	MER006046	2.3e-58
VFPFJ_01034	S16	S821, K864	MER000485	1.7e-52
VFPFJ_06272	S16	S993, K1036	MER000496	2.5e-86
VFPFJ_06327	S26A	S60, K106	MER000598	1.7e-22
VFPFJ_10658	S26A	S40, K86	MER000597	1.5e-19
VFPFJ_10547	S26B	S49, H90	MER000602	2.9e-37
VFPFJ_04223	S28	S194, D472, H503	MER093133	1.5e-38
VFPFJ_07430	S28	S221, D500, H533	MER093133	1.5e-161
VFPFJ_00172	S33	S315, D485, H511	MER208659	1.4e-35
VFPFJ_00199	S33	R96S, >D, >H	MER031610	7e-07
VFPFJ_00522	S33	S105, D247, H275	MER000437	3.1e-16
VFPFJ_00578	S33	S117, D243, H274	MER031618	3.1e-18
VFPFJ_00608	S33	D122S, Q214D, A278H	MER031610	5.6e-36
VFPFJ_01077	S33	S271, >D, >H	MER011785	5e-32
VFPFJ_01362	S33	S426, >D, >H	MER211636	5.3e-16
VFPFJ_01462	S33	S159, D407, H436	MER044357	1.1e-127
VFPFJ_01569	S33	S313, >D, >H	MER000440	2.2e-12
VFPFJ_02024	S33	S242, D480, H508	MER000440	1.8e-34
VFPFJ_02372	S33	P10S, >D, >H	MER033263	2.5e-05
VFPFJ_02796	S33	S138, >D, >H	MER209971	1.5e-06
VFPFJ_02869	S33	D102S, >D, >H	MER017177	1.3e-12
VFPFJ_03678	S33	S153, D280, >H	MER037236	5.6e-12
VFPFJ_03789	S33	S115, >D, >H	MER017142	4.9e-06
VFPFJ_03792	S33	S141, >D, >H	MER209971	3.8e-09
VFPFJ_04112	S33	S310, >D, >H	MER004231	4.6e-25
VFPFJ_04229	S33	D102S, >D, >H	MER017123	4.2e-05
VFPFJ_04305	S33	S125, >D, >H	MER044357	1.2e-10
VFPFJ_04530	S33	S97, D227, H256	MER026339	3.6e-84
VFPFJ_04951	S33	S201, D335, H357	MER036069	6.3e-50
VFPFJ_05345	S33	S179, D422, H450	MER001367	4e-62
VFPFJ_05390	S33	S195, >D, >H	MER036115	7.7e-07
VFPFJ_05561	S33	D116S, D284, H311	MER017177	8.9e-43
VFPFJ_05724	S33	S68, >D, >H	MER000440	5.1e-06
VFPFJ_06366	S33	S71, >D, >H	MER213595	1.7e-09
VFPFJ_07288	S33	P377S, >D, >H	MER031610	3.1e-05
VFPFJ_07641	S33	S241, >D, >H	MER036062	6.8e-06
VFPFJ_07995	S33	S203, D332, H361	MER059846	9.3e-29
VFPFJ_08052	S33	G188S, >D, >H	MER000432	4.9e-05
VFPFJ_08225	S33	S135, D277, H306	MER025512	1.5e-16
VFPFJ_08342	S33	S230, >D, >H	MER044357	4.1e-32
VFPFJ_08475	S33	>S, >D, >H	MER000440	6.2e-12
VFPFJ_09349	S33	S166, D316, H344	MER044899	1.5e-12
VFPFJ_09634	S33	D175S, D349, H375	MER000432	1.1e-49
VFPFJ_09716	S33	D499S, >D, >H	MER017177	3e-10
VFPFJ_09755	S33	D172S, D344, H370	MER000432	3.7e-50
VFPFJ_09908	S33	S321, >D, >H	MER004231	7.4e-21
VFPFJ_10040	S33	S451, >D, >H	MER210990	4.2e-16
VFPFJ_10232	S33	S112, D228, H257	MER017193	7.1e-10
VFPFJ_10280	S33	S235, D468, H496	MER000440	3.5e-13
VFPFJ_10380	S33	>S, >D, >H	MER017177	6.8e-06
VFPFJ_10384	S33	S156, >D, >H	MER044899	1.7e-08
VFPFJ_10401	S33	S125, >D, >H	MER044357	1.1e-08
VFPFJ_10404	S33	>S, >D, >H	MER004231	4.2e-09
VFPFJ_10414	S33	D105S, P276D, H303	MER017177	5.3e-24
VFPFJ_10563	S33	S151, >D, >H	MER044357	1.2e-15
VFPFJ_10801	S33	S144, >D, >H	MER036083	3e-14
VFPFJ_11351	S33	D101S, >D, >H	MER014065	1e-15
VFPFJ_11428	S33	D101S, >D, >H	MER014065	1.9e-15
VFPFJ_11646	S33	S157, D311, >H	MER209583	1.3e-10
VFPFJ_04450	S53	<E, <D, D417, S550	MER005329	1.5e-72
VFPFJ_04489	S53	<E, <D, D404, S516	MER078639	1e-55
VFPFJ_05173	S53	E314, D318, D437, S570	MER005329	3e-94
VFPFJ_09325	S53	<E, <D, X370D, S487	MER078639	1.3e-39
VFPFJ_10185	S53	E323, D327, D452, S601	MER005329	7.8e-133
VFPFJ_10498	S53	K237E, E241D, D358, S491	MER005329	7.4e-89
VFPFJ_10813	S53	D279E, A283D, X373D, S490	MER078639	1.8e-79
VFPFJ_10845	S53	F329E, E338D, D454, S587	MER005329	1.3e-73
VFPFJ_11041	S53	E283, D287, X375D, S491	MER078639	8.2e-67
VFPFJ_02321	S54	-157S, H209	MER034660	1.2e-09
VFPFJ_05109	S54	S452, H511	MER015472	8.3e-21
VFPFJ_02670	S59	H1050, T1052S	MER020214	1.1e-31
VFPFJ_00950	T01A	S28T	MER000558	7.4e-72
VFPFJ_01414	T01A	T30	MER001645	2.6e-74
VFPFJ_03331	T01A		MER001710	7.2e-68
VFPFJ_03416	T01A	T42	MER001711	6.8e-43
VFPFJ_03476	T01A	S43T	MER005692	2e-61
VFPFJ_04264	T01A		MER000554	1.3e-54
VFPFJ_04975	T01A	<T	MER000553	2.7e-29
VFPFJ_05217	T01A	T30	MER000542	1.6e-80
VFPFJ_05396	T01A	T69	MER001516	2e-97
VFPFJ_05629	T01A		MER004372	1.1e-66
VFPFJ_07983	T01A	K59T	MER002676	3.4e-40
VFPFJ_08200	T01A	S33T	MER000549	1.4e-62
VFPFJ_09409	T01A		MER000557	2.3e-41
VFPFJ_03808	T01X	T33	MER004996	9e-45
VFPFJ_04153	T02	T313	MER003338	1.1e-12
VFPFJ_04209	T02	T235	MER003299	3.4e-25
VFPFJ_06727	T02	>T	MER017622	1.8e-20
VFPFJ_04355	T03	T407	MER223926	2.2e-37
VFPFJ_06723	T03	T384	MER001629	3.5e-97
VFPFJ_09310	T03	T378	MER003580	7.3e-106
VFPFJ_10395	T03	>S/T	MER223926	3.2e-17
VFPFJ_10396	T03	T187	MER223926	6.6e-42
VFPFJ_11061	T03	T378	MER001629	2.6e-95
VFPFJ_11430	T03	T367	MER001629	3.8e-90
VFPFJ_08073	T05	T214	MER011829	5e-56
